# Supplementary material
Source: PubMed Central journal article supplement (PMC7328389)
Supplement: rsif20200011supp3.pdf [file rsif20200011supp3.pdf]

Supplemental Material. The Effects of Motor  
Modularity on Performance, Learning, and  
Generalizability in Upper-Extremity Reaching: a  
Computational Analysis

Mazen Al Borno\*, Jennifer L. Hicks and Scott L. Delp

Department of Bioengineering and Mechanical Engineering,  
Stanford University

| Nbr | Muscle                      |
|-----|-----------------------------|
| 1   | Deltoid Anterior            |
| 2   | Deltoid Medial              |
| 3   | Deltoid Posterior           |
| 4   | Supraspinatus               |
| 5   | Infraspinatus               |
| 6   | Subscapularis               |
| 7   | Teres minor                 |
| 8   | Teres major                 |
| 9   | Pectoralis major Clavicular |
| 10  | Pectoralis major Sternal    |
| 11  | Pectoralis major Ribs       |
| 12  | Latissimus dorsi Thoracic   |
| 13  | Latissimus dorsi Lumbar     |
| 14  | Latissimus dorsi Iliac      |
| 15  | Coracobrachialis            |
| 16  | Elbow Triceps Long          |
| 17  | Elbow Triceps Lateral       |

\*Corresponding author: malborno@stanford.edu

|    |                                        |
|----|----------------------------------------|
| 18 | Elbow Triceps Medial                   |
| 19 | Anconeuse                              |
| 20 | Supinator                              |
| 21 | Biceps Brachialis                      |
| 22 | Biceps Brachioradialis                 |
| 23 | Extensor carpi radialis longus         |
| 24 | Extensor carpi radialis brevis         |
| 25 | Extensor carpi ulnaris                 |
| 26 | Flexor carpi radialis                  |
| 27 | Flexor carpi ulnaris                   |
| 28 | Palmaris longus                        |
| 29 | Pronator teres                         |
| 30 | Pronator quadratus                     |
| 31 | Flexor digitorum superficialis Digit 5 |
| 32 | Flexor digitorum superficialis Digit 4 |
| 33 | Flexor digitorum superficialis Digit 3 |
| 34 | Flexor digitorum superficialis Digit 2 |
| 35 | Flexor digitorum profundus Digit 5     |
| 36 | Flexor digitorum profundus Digit 4     |
| 37 | Flexor digitorum profundus Digit 3     |
| 38 | Flexor digitorum profundus Digit 2     |
| 39 | Extensor digitorum communis Digit 5    |
| 40 | Extensor digitorum communis Digit 4    |
| 41 | Extensor digitorum communis Digit 3    |
| 42 | Extensor digitorum communis Digit 2    |
| 43 | Extensor digiti minimi                 |
| 44 | Extensor indicis propius               |
| 45 | Extensor pollicis longus               |
| 46 | Extensor pollicis brevis               |
| 47 | Flexor pollicis longus                 |

Table S1: **Muscle for each number.**

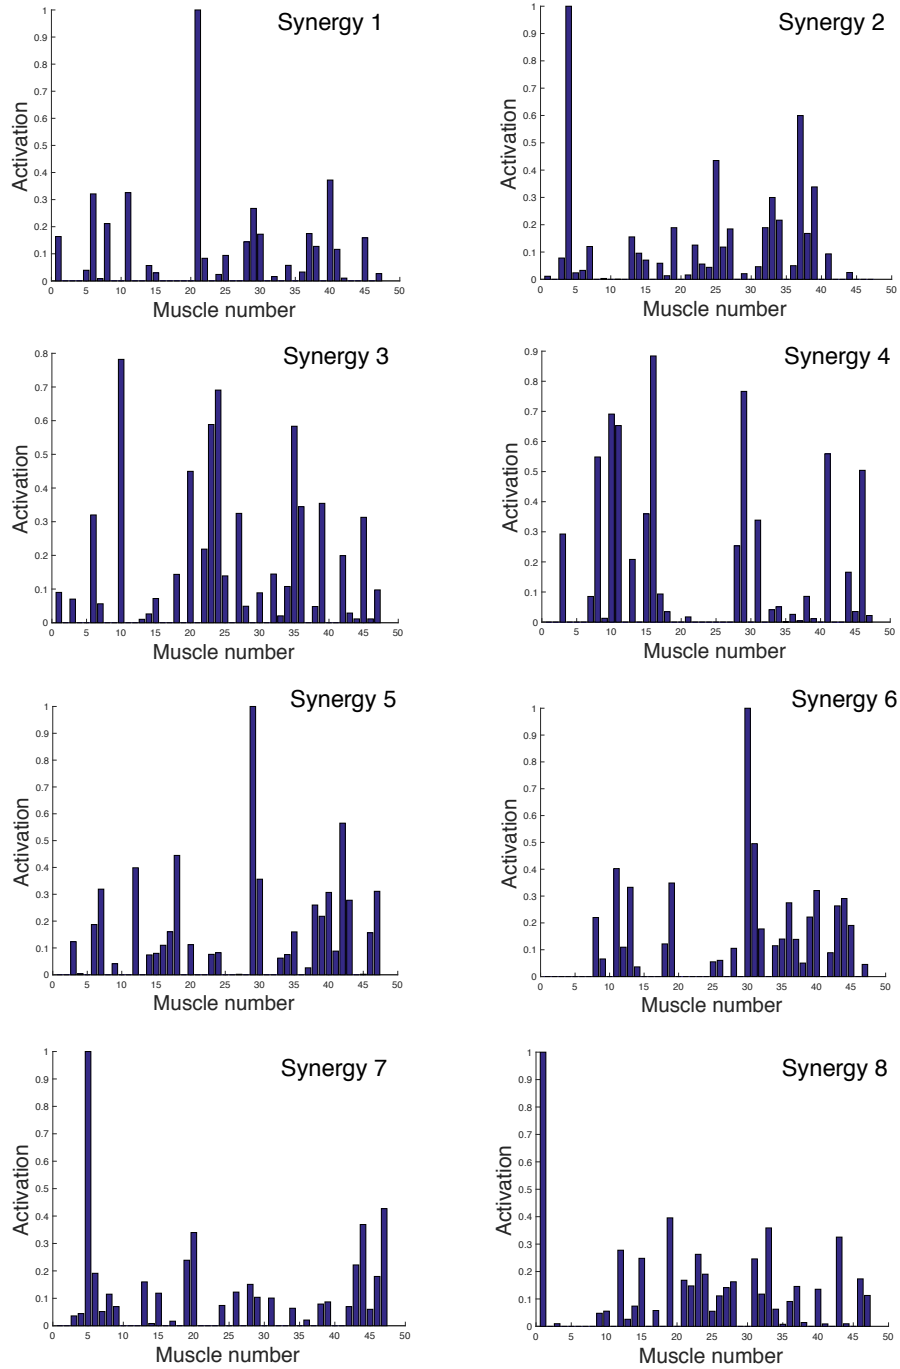

Figure S1: First eight synergies computed by NNMF..

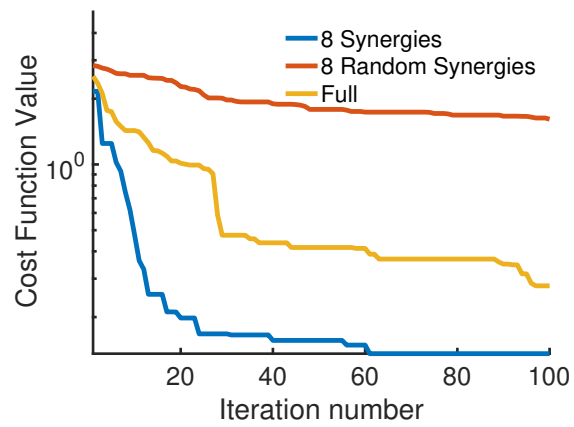

Figure S2: **Effect of synergies on convergence rates.** Convergence rate for the controller with 8 synergies (blue) compared to 8 random synergies (red) and the full-dimensional system (yellow) for a representative run.
